# Supplementary material for: Superhard B2CO phases derived from carbon allotropes
Source: Royal Society of Chemistry journal article supplement (doi:10.1039/c7ra09277f), 2017-01-01
Supplement: c7ra09277f1.pdf [file c7ra09277f1.pdf]

## Supporting Information

### Superhard B<sub>2</sub>CO phases deriving from carbon allotropes

Chao Liu<sup>a</sup>, Mingwei Chen<sup>b</sup>, Julong He<sup>c</sup>, Shuangshuang Yu<sup>a</sup>, Tongxiang Liang<sup>\*a</sup>

a School of Materials Science and Engineering, Jiangxi University of Science and Technology,  
Ganzhou 341000, China

b Institute of Engineering Research, Jiangxi University of Science and Technology, Ganzhou  
341000, China

c State Key Laboratory of Metastable Materials Science and Technology, Yanshan University,  
Qinhuangdao 066004, China

Author to whom correspondence should be addressed. E-mail address: liang\_tx@126.com.

In order to compare the differences of results based on LDA and GGA, the lattice parameters, mechanical property, and electrical property have been calculated.

**Table S1** lattice parameters  $a$ ,  $b$ ,  $c$  (Å) for  $oP16$ -, and  $oC16$ -B<sub>2</sub>CO at zero pressure and 80 GPa.

|     | $oP16$                                          |                                                 | $oC16$                                          |                                                 |
|-----|-------------------------------------------------|-------------------------------------------------|-------------------------------------------------|-------------------------------------------------|
|     | 0 GPa                                           | 80 GPa                                          | 0 GPa                                           | 80 GPa                                          |
| LDA | $a = 8.847$ ;<br>$b = 4.364$ ;<br>$c = 2.603$ ; | $a = 8.264$ ;<br>$b = 4.111$ ;<br>$c = 2.451$ ; | $a = 6.142$ ;<br>$b = 6.421$ ;<br>$c = 2.601$ ; | $a = 5.663$ ;<br>$b = 6.067$ ;<br>$c = 2.460$ ; |
| GGA | $a = 8.985$ ;<br>$b = 4.425$ ;<br>$c = 2.643$ ; | $a = 8.363$ ;<br>$b = 4.151$ ;<br>$c = 2.478$ ; | $a = 6.263$ ;<br>$b = 6.500$ ;<br>$c = 2.639$ ; | $a = 5.740$ ;<br>$b = 6.116$ ;<br>$c = 2.486$ ; |

The maximum difference is 2%, the minimum difference is 0.8%.

**Table S2** Independent elastic constants  $C_{ij}$ , and mechanical property parameters as  $B$ ,  $G$  of  $oP16$ -, and  $oC16$ -B<sub>2</sub>CO based on GGA-PBE.  $C_{ij}$ ,  $B$ , and  $G$  are expressed in GPa.

|        | $C_{11}$ | $C_{22}$ | $C_{33}$ | $C_{44}$ | $C_{55}$ | $C_{66}$ | $C_{12}$ | $C_{13}$ | $C_{23}$ | $B$   | $G$   |
|--------|----------|----------|----------|----------|----------|----------|----------|----------|----------|-------|-------|
| $oP16$ | 665.3    | 724.0    | 715.2    | 252.7    | 280.8    | 256.7    | 92.9     | 89.0     | 61.9     | 288.0 | 280.8 |
| $oC16$ | 511.5    | 630.2    | 744.1    | 289.6    | 216.2    | 245.0    | 160.0    | 39.31    | 109.1    | 275.2 | 251.1 |

$oP16$ -, and  $oC16$ -B<sub>2</sub>CO are both mechanical stable.

**Table S3** Calculated volume  $V$  for unit cell (Å<sup>3</sup>), bond parameter as bond-type  $\mu$ , bond length  $d^\mu$  (Å), bond number  $n^\mu$  and  $H_V$  (GPa) for  $oP16$ -, and  $oC16$ -B<sub>2</sub>CO based on GGA-PBE.

|        | $V$     | $\mu$     | $d^\mu$ | $n^\mu$ | $N_e^\mu$ | $f_i^\mu$ | $H_V^\mu$ | $H_V$  |
|--------|---------|-----------|---------|---------|-----------|-----------|-----------|--------|
| $oP16$ | 105.103 | B-C (I)   | 1.560   | 8       | 0.591     | 0.313     | 55.859    | 44.513 |
|        |         | B-C (II)  | 1.600   | 4       | 0.547     | 0.161     | 59.655    |        |
|        |         | B-C (III) | 1.607   | 4       | 0.541     | 0.110     | 62.346    |        |
|        |         | B-O (I)   | 1.624   | 4       | 0.673     | 0.785     | 31.353    |        |

|              |         |           |       |   |       |       |        |        |
|--------------|---------|-----------|-------|---|-------|-------|--------|--------|
|              |         | B-O (II)  | 1.650 | 4 | 0.642 | 0.831 | 27.674 |        |
|              |         | B-O (III) | 1.655 | 8 | 0.636 | 0.529 | 39.123 |        |
| <i>o</i> C16 | 107.414 | B-C (I)   | 1.541 | 8 | 0.599 | 0.351 | 55.510 | 41.342 |
|              |         | B-C (II)  | 1.614 | 8 | 0.521 | 0.276 | 49.335 |        |
|              |         | B-O (I)   | 1.633 | 8 | 0.647 | 0.495 | 42.555 |        |
|              |         | B-O (II)  | 1.663 | 8 | 0.613 | 0.873 | 25.065 |        |

Whether based on LDA or GGA, the *o*P16-, and *o*C16-B<sub>2</sub>CO are both superhard.

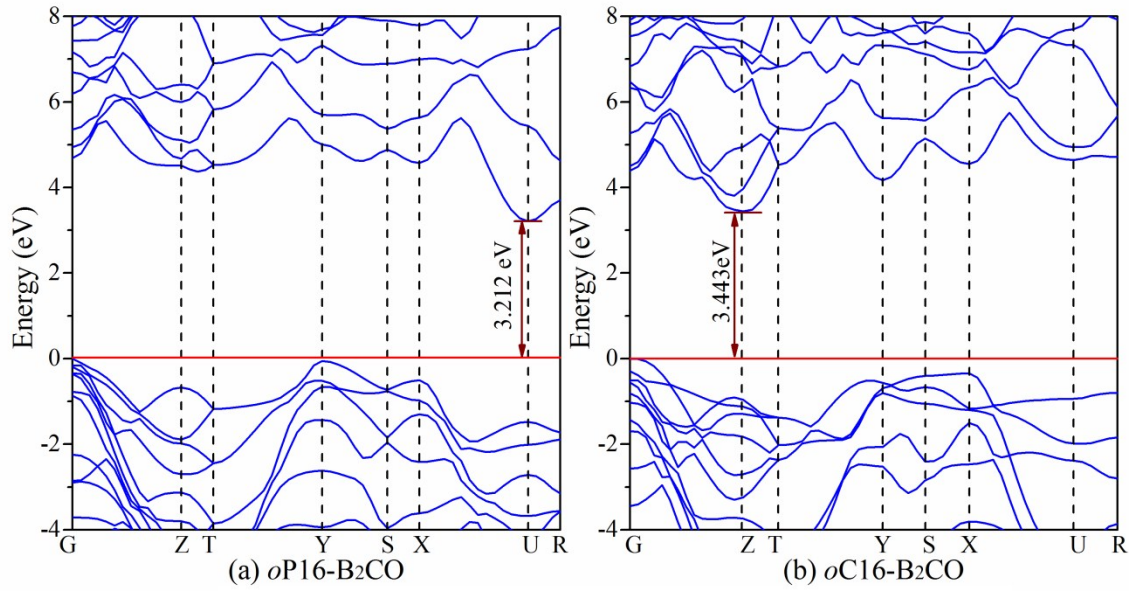

**Figure S1** Calculated electronic band structures for *o*P16-, and *o*C16-B<sub>2</sub>CO at zero pressure based on GGA-PBE. The Fermi level is represented by a horizontal red line.

The band structures deviations of *o*P16-B<sub>2</sub>CO and *o*C16-B<sub>2</sub>CO are 1.65% and 0.91%, respectively.

The results indicated that the LDA and GGA have little influence on the system we studied. The trend obtained by LDA is correct and validated.
